# Supplementary material
Source: Royal Society of Chemistry journal article supplement (doi:10.1039/d6ce00074f)
Supplement: d6ce00074f1.pdf [file d6ce00074f1.pdf]

## Supporting information

### The effect of n-Butanol on regulating the solubility-temperature characteristics for the Growth of High-Quality CsPbBr<sub>3</sub> Single Crystals

Jianing Hu<sup>a</sup>, Fangxiong Tang<sup>b</sup>, Yan Zhu<sup>\*a,c</sup>, Yuzhe Zhang<sup>c</sup>, Huaxing Gou<sup>a</sup>, Haoyan Ye<sup>b</sup>, Siyu Han<sup>b</sup>, Hengyong Bu<sup>a</sup>, Run Xu<sup>\*b,d</sup>

*a Faculty of Materials Science and Technology, Kunming University of Science and Technology, Kunming 650093, China.*

*b State Key Laboratory of Materials for Advanced Nuclear Energy, Shanghai University, Shanghai, 200444, China.*

*c Shanghai Technical Institute of Electronics & Information, Shanghai 201411, China, Postal address: No. 3098 Wahong Road, Fengcheng Town, Fengxian District, Shanghai, 201411, China.*

*d Zhejiang Institute of Advanced Materials, SHU, 1588 Huaxiang Street, Jiashan, 314113, China.*

Corresponding author:

Yan Zhu (zhuyan@kust.edu.cn), and Run Xu (runxu@staff.shu.edu.cn)

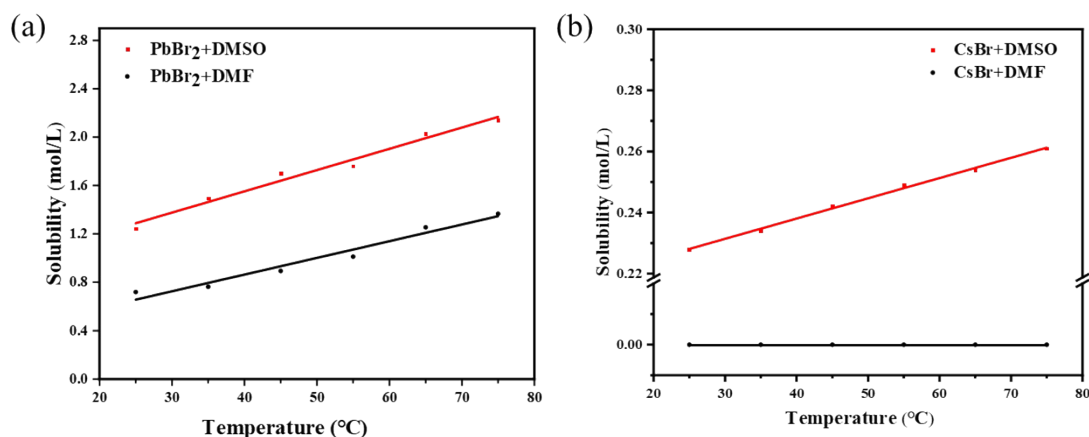

**Figure S1.** (a) Solubility curves of PbBr<sub>2</sub> in DMSO and DMF. (b) Solubility curves of CsBr in DMSO and DMF.

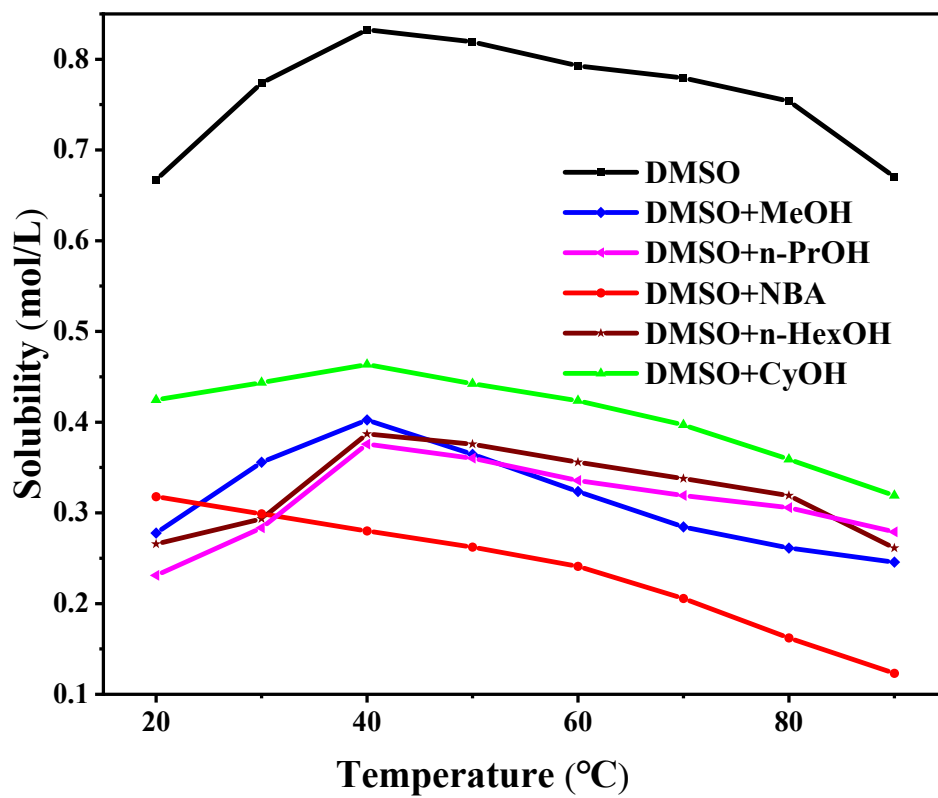

**Figure S2.** Solubility curves of CsPbBr<sub>3</sub> in DMSO and DMSO with different alcohols added.

**Table S1** Summary of the growth of CsPbBr<sub>3</sub> single crystals.

| Reference | Solvent       | Additives           | Growth method    | Growth temperature (°C) | XRC (°) | $\tau$ or $\mu\tau$ (ns or cm <sup>2</sup> /V) |
|-----------|---------------|---------------------|------------------|-------------------------|---------|------------------------------------------------|
| [1]       | DMSO          | none                | LTC <sup>a</sup> | 27-30                   | none    | none                                           |
| [2]       | DMSO          | none                | ITC <sup>b</sup> | 110                     | none    | $\tau_2=17.03$                                 |
| [3]       | DMSO          | none                | ITC <sup>b</sup> | 140                     | 0.043   | none                                           |
| [4]       | DMSO          | Choline Bromide     | ITC <sup>b</sup> | 80-85                   | none    | $\mu\tau_e=1.80 \times 10^{-3}$                |
| [5]       | DMSO          | TMAB                | ITC <sup>b</sup> | 60-85                   | none    | $\tau_{ave}=88$                                |
| [6]       | DMSO          | Bromoacetic acid    | ITC <sup>b</sup> | 105                     | 0.07    | $\tau=80$                                      |
| [7]       | DMSO          | none                | ITC <sup>b</sup> | 85                      | none    | $\mu\tau_h=9.01 \times 10^{-4}$                |
| [8]       | DMSO/DMF      | Acetonitrile        | ITC <sup>b</sup> | 45-60                   | 0.035   | $\mu\tau=2.57 \times 10^{-4}$                  |
| [9]       | DMSO/DMF/CyOH | none                | ITC <sup>b</sup> | 90-110                  | none    | $\mu\tau=2 \times 10^{-4}$                     |
| [10]      | DMSO/DMF/CyOH | none                | ITC <sup>b</sup> | 49.5                    | none    | $\tau_1=2.9;$<br>$\tau_2=25.1$                 |
| [11]      | DMSO/DMF/CyOH | none                | ITC <sup>b</sup> | 50-90                   | none    | none                                           |
| [12]      | DMSO/DMF/CyOH | none                | ITC <sup>b</sup> | 40-80                   | none    | $\mu\tau=2.8 \times 10^{-4}$                   |
| [13]      | DMSO/DMF/CyOH | Choline Bromide     | ITC <sup>b</sup> | below 85                | 0.082   | $\tau_1=0.70$<br>$\tau_2=6.51$                 |
| [14]      | DMSO/DMF/CyOH | 4-bromobutyric acid | ITC <sup>b</sup> | 60-85                   | 0.025   | $\mu\tau_h=0.57 \times 10^{-4}$                |
| This work | DMSO          | n-butanol           | ITC <sup>b</sup> | 50-85                   | 0.035   | $\mu\tau_h=0.67 \times 10^{-4}$                |

a LTC: Low-temperature crystallization; b ITC: Inverse temperature crystallization

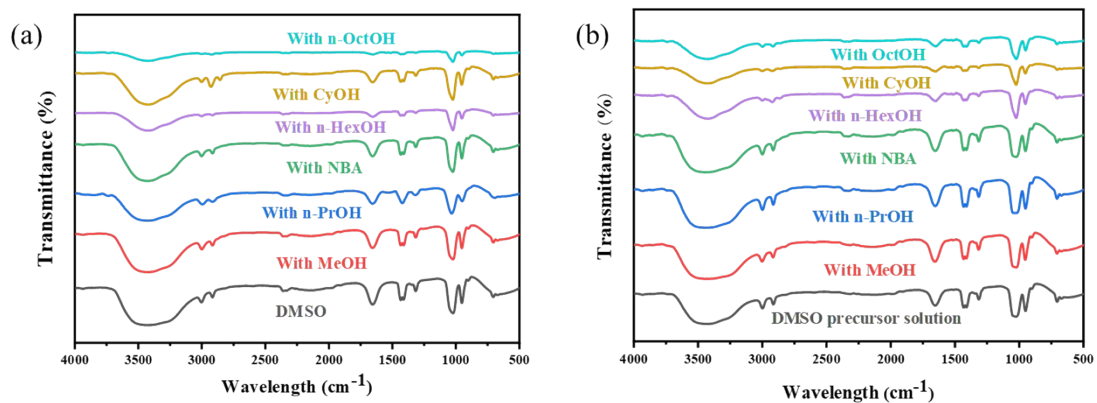

**Figure S3.** (a) FTIR spectra of different alcohols mixed in DMSO. (b) FTIR spectra of different alcohols mixed in CsPbBr<sub>3</sub> precursor solution.

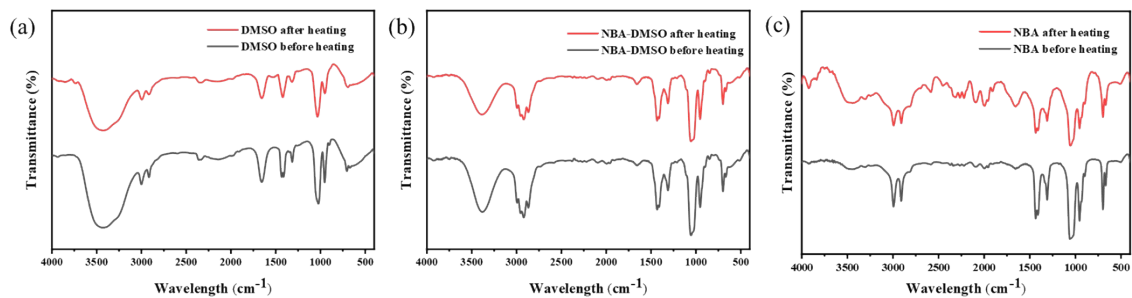

**Figure S4.** FTIR spectra of different solvents before and after thermal treatment: (a) pure DMSO, (b) NBA in DMSO, and (c) pure NBA.

**Table S2** Summary of Tyndall effect in different precursors containing different alcohols at 30°C~70°C.

| Temperature       | 30°C                                                                              | 40°C                                                                              | 50°C                                                                              | 60°C                                                                               | 70°C                                                                                |
|-------------------|-----------------------------------------------------------------------------------|-----------------------------------------------------------------------------------|-----------------------------------------------------------------------------------|------------------------------------------------------------------------------------|-------------------------------------------------------------------------------------|
| DMSO              |  |  |  |  |  |
| DMSO+DMF<br>+CyOH |  |  |  |  |  |
| DMSO+NBA          |  |  |  |  |  |

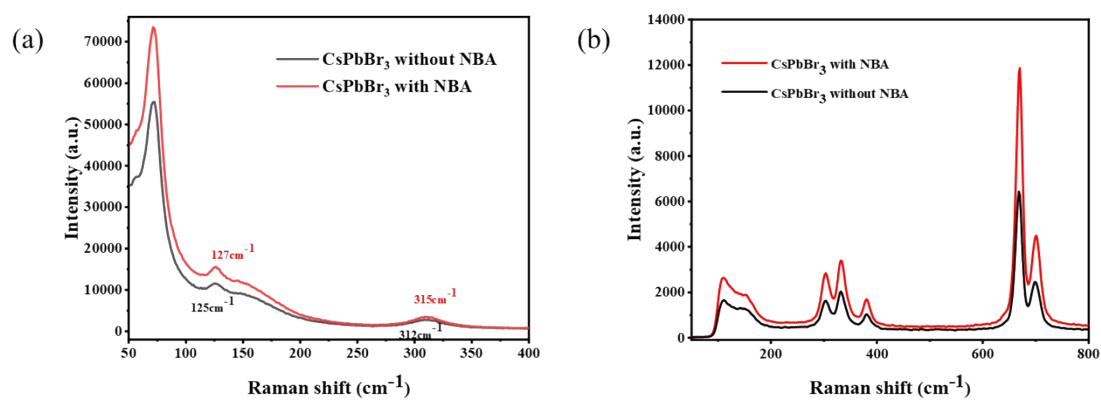

**Figure S5.** (a) Raman spectra of CsPbBr<sub>3</sub> powders synthesized with and without NBA additive. (b) Raman spectra of CsPbBr<sub>3</sub> solution grown with or without NBA additive.

**Table S3** Key solvent parameters of different alcohols.

| Solvent      | DN (kcal/mol) | $\sigma$ (Å) | $\epsilon_r$ (25°C) | $\mu$ (D) |
|--------------|---------------|--------------|---------------------|-----------|
| Methanol     | 19            | 3.6          | 32.7                | 1.7       |
| n-Propanol   | 21.1          | 4.7          | 20.5                | 1.58      |
| n-Butanol    | 19.5          | 5.0          | 17.5                | 1.66      |
| n-Hexanol    | 17.4          | 5.4          | 13.0                | 1.60      |
| Cyclohexanol | ~20           | 5.8          | 15.9                | 1.85      |
| DMSO         | 29.8          | 4.4          | 46.7                | 3.96      |

The data comes from [15-18].

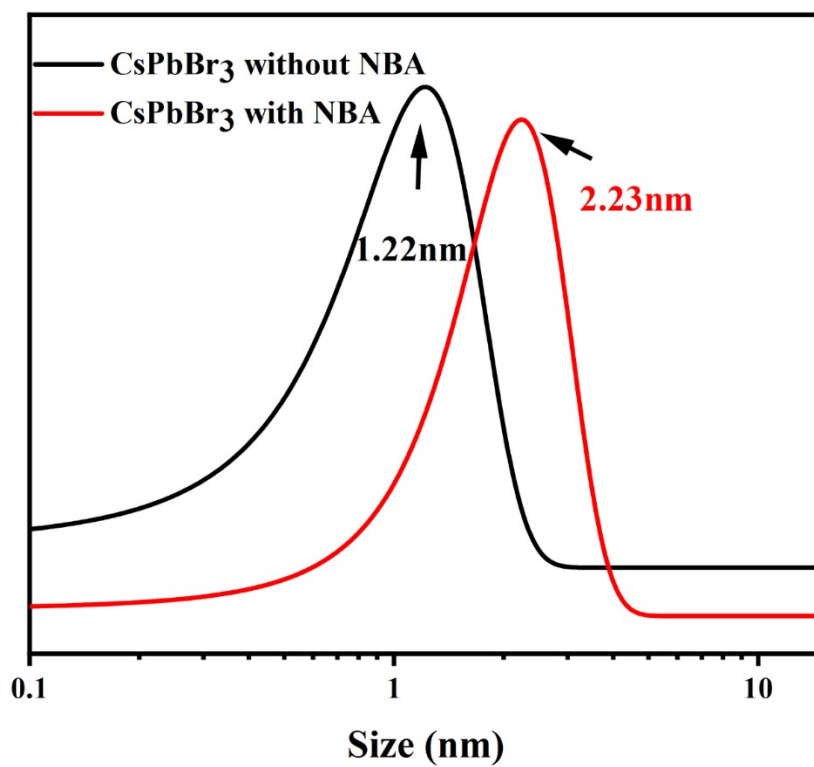

**Figure S6.** Particle size diagram of CsPbBr<sub>3</sub> precursor solution with and without NBA

addition.

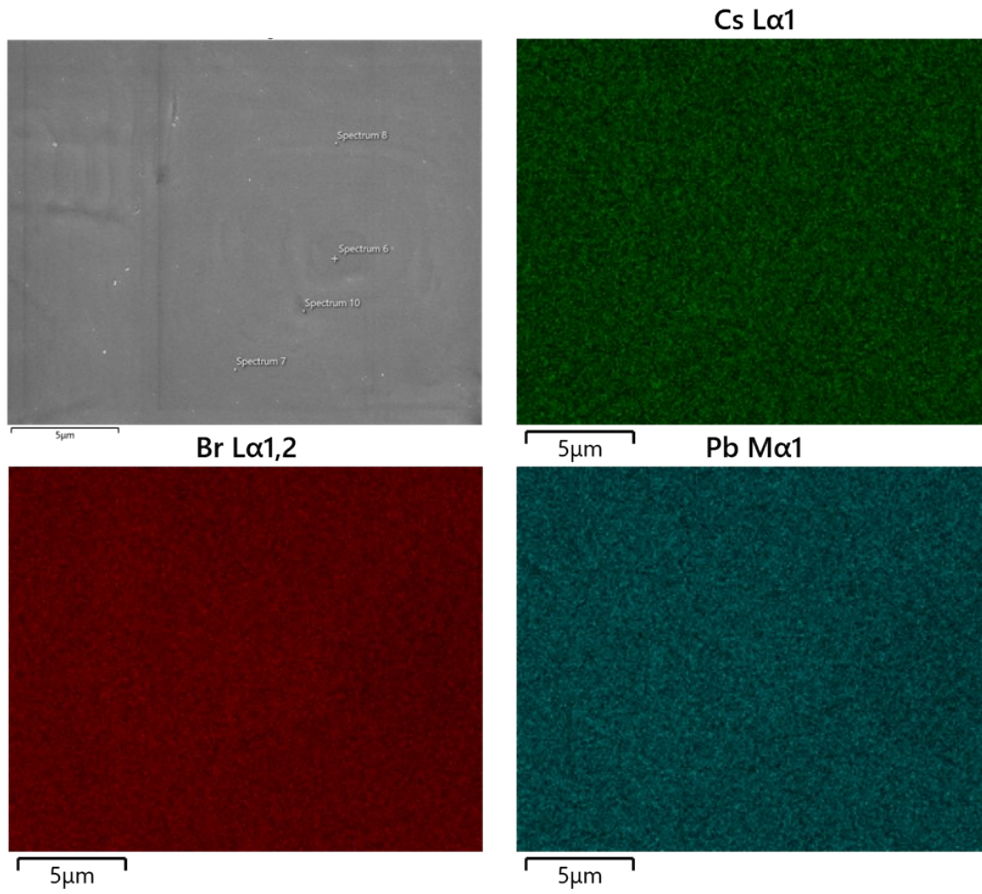

**Figure S7.** SEM and corresponding EDS elemental mapping images of CsPbBr<sub>3</sub> crystal surface.

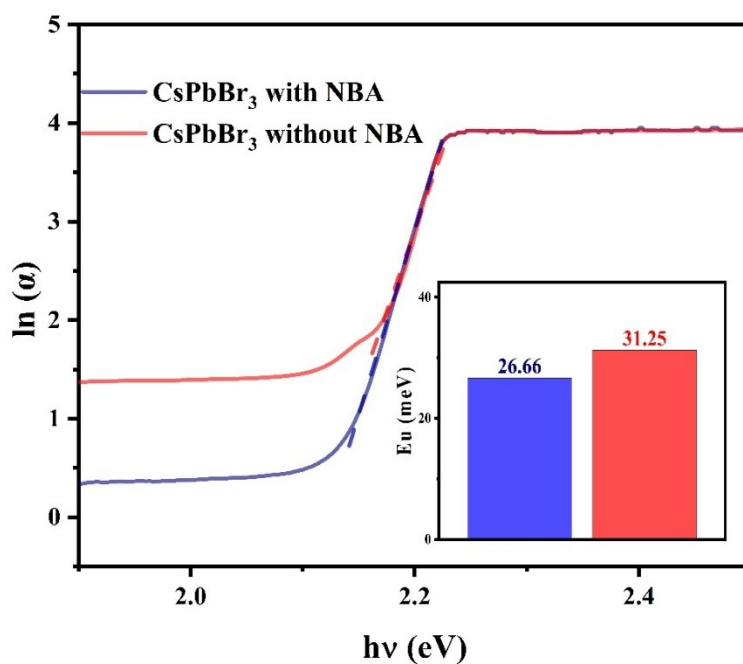

**Figure S8.** Urbach energy analysis of the CsPbBr<sub>3</sub> single crystal grown.

**Table S4** Quantitative elemental analysis of CsPbBr<sub>3</sub> crystals via EDS point-scan mode.

| Element | Spectrum 6 |                     | Spectrum 7 |                     | Spectrum 9 |                     | Spectrum 10 |                     | Map Sum Spectrum |                     |
|---------|------------|---------------------|------------|---------------------|------------|---------------------|-------------|---------------------|------------------|---------------------|
|         | at.%       | ratio               | at.%       | ratio               | at.%       | ratio               | at.%        | ratio               | at.%             | ratio               |
| Cs      | 21.64      | 1                   | 21.48      | 1                   | 21.63      | 1                   | 22.05       | 1                   | 21.30            | 1                   |
| Pb      | 20.96      | 0.97                | 20.78      | 0.97                | 20.86      | 0.96                | 20.61       | 0.94                | 20.60            | 0.97                |
| Br      | 57.39      | 2.65                | 57.73      | 2.69                | 57.51      | 2.66                | 57.34       | 2.60                | 58.10            | 2.73                |
| Total   | 100        | CsPbBr <sub>3</sub> | 100        | CsPbBr <sub>3</sub> | 100        | CsPbBr <sub>3</sub> | 100         | CsPbBr <sub>3</sub> | 100              | CsPbBr <sub>3</sub> |

## References

1. P. Sujith, M. Pratheek, S. R. Parne and P. Predeep, *J. Electron. Mater.*, 2023, **52**, 718-729.
2. L. Gao, J.-L. Sun, Q. Li and Q. Yan, *ACS Appl. Mater. Interfaces*, 2022, **14**, 37904-37915.
3. M. Chen, Y. Yuan, Y. Liu, D. Cao and C. Xu, *RSC Adv.*, 2022, **12**, 14838-14843.
4. Y. Feng, L. Pan, H. Wei, Y. Liu, Z. Ni, J. Zhao, P. N. Rudd, L. R. Cao and J. Huang, *J. Mater. Chem. C*, 2020, **8**, 11360-11368.
5. L. Pan, Z. Liu, C. Welton, V. V. Klepov, J. A. Peters, M. C. De Siena, A. Benadia, I. Pandey, A. Miceli, D. Chung, G. N. M. Reddy, B. W. Wessels and M. G. Kanatzidis, *Adv. Mater.*, 2023, **35**, 2211840.
6. Z. Xue, Y. Wei, H. Li, J. Peng, F. Yao, Y. Liu, S. Wang, Q. Zhou, Q. Lin and Z. Wang, *Small*, 2023, **19**, 2207588.
7. H. Qin, N. Shen, B. Xiao, X. He, Y. Wang, Q. Sun, S. Wei, X. Ouyang, B. Zhou, Z. Wu, Q. Min, R. Ren, N. Ding, W. Chen, X. Wang, Z. Chai, X. Ouyang and Y. He, *Adv. Funct. Mater.*, 2025, **35**, e09390.
8. K. Mou, X. Feng, F. Tang, W. Wang, X. Tang, Y. Liu, B. Zeng, S. Bao, M. Cui, J. Hu, H. Gou, Y. Zhu, J. Liu and R. Xu, *Journal of Materials Chemistry C*, 2025, **13**: 9154.
9. D. N. Dirin, I. Cherniukh, S. Yakunin, Y. Shynkarenko and M. V. Kovalenko, *Chem. Mater.*, 2016, **28**, 8470-8474.
10. H. Zhang, F. Wang, Y. Lu, Q. Sun, Y. Xu, B. Zhang, W. Jie and M. G. Kanatzidis, *J. Mater. Chem. C*, 2020, **8**, 1248-1256.
11. Y. Cheng, M. Zhu, F. Wang, R. Bai, J. Yao, W. Jie and Y. Xu, *J. Mater. Chem. A*, 2021, **9**, 27718-27726.
12. F. Wang, R. Bai, Q. Sun, X. Liu, Y. Cheng, S. Xi, B. Zhang, M. Zhu, S. Jiang, W. Jie and Y. Xu, *Chem. Mater.*, 2022, **34**, 3993-4000.
13. P. Cheng, Z. Liu, R. Kang, J. Zhou, X. Wang, J. Zhao and Z. Zuo, *ACS Omega*, 2023, **8**, 26351-26358.
14. Y. Liu, M. Cui, X. Feng, W. Wang, X. Tang, S. Bao, K. Mou, B. Zeng, F. Tang, J. Hu, H. Gou, J. Liu, Y. Zhu and R. Xu, *ACS Photonics*, 2025, **12(4)**: 2044-2052.
15. A. S. Tutantsev, N. N. Udalova, S. A. Fateev, A. A. Petrov, W. Chengyuan, E. G. Maksimov, E. A. Goodilin and A. B. Tarasov, *J. Phys. Chem. C*, 2020, **124**, 11117-11123.
16. C. M. Hansen, *Hansen Solubility Parameters: A User's Handbook*, 2nd ed., CRC Press, Boca Raton, 2007.
17. D. R. Lide, *CRC Handbook of Chemistry and Physics*, 103rd ed., CRC Press, Boca Raton, 2022-2023.
18. A. A. Petrov, A. A. Ordinartsev, S. A. Fateev, E. A. Goodilin and A. B. Tarasov, *Molecules*, 2021, **26(24)**, 7541.
